# Supplementary material
Source: PubMed Central journal article supplement (PMC3754178)
Supplement: AEM.01608-13_zam999104676so1.pdf [file AEM.01608-13_zam999104676so1.pdf]

A

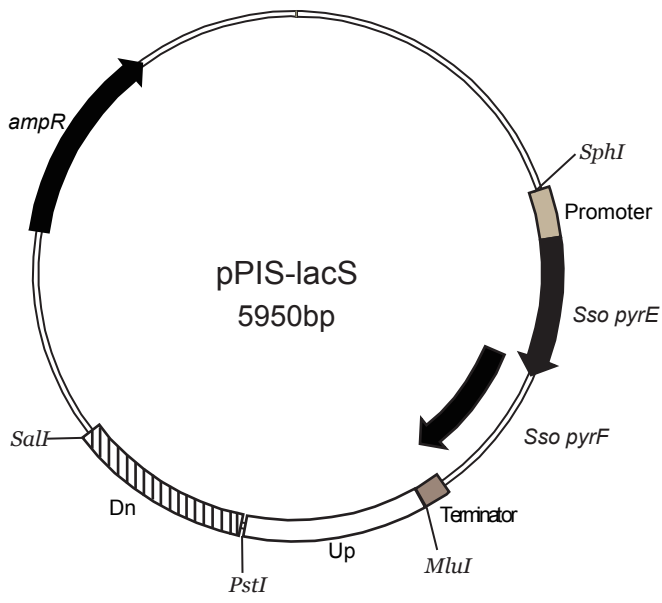

B

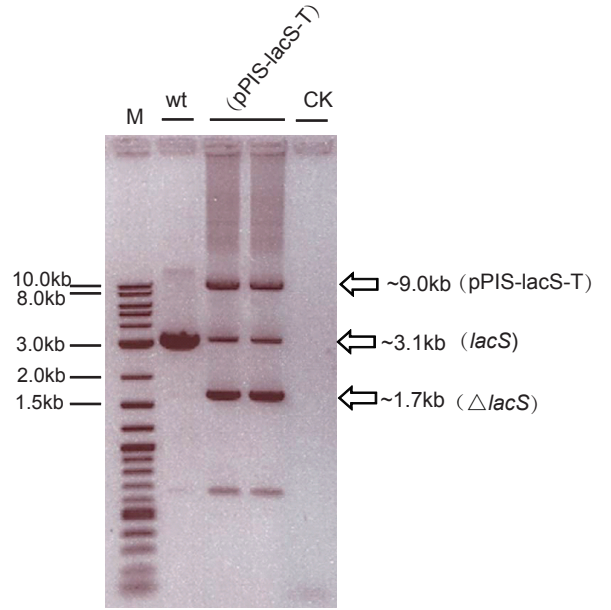

C

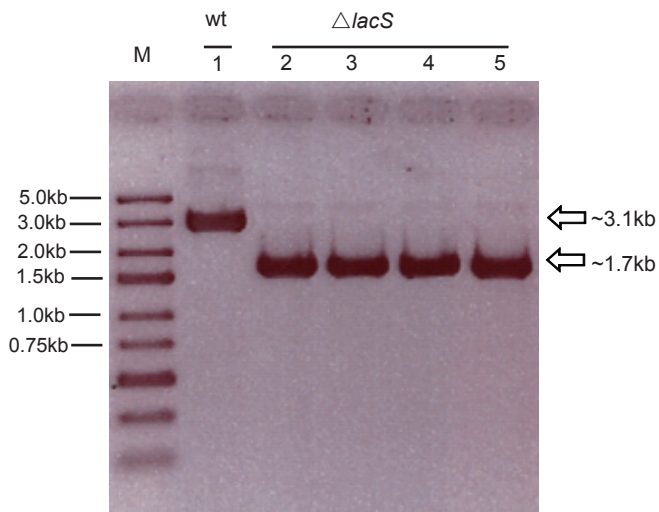

D

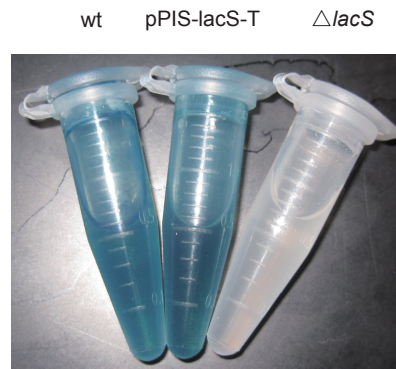

1 **Fig. S1. Construction of a *lacS* deletion on M.16.04 RJW002 ( $\Delta$ *pyrEF*) chromosome via**  
2 **conventional Plasmid Integration and Segregation (PIS) method.** (A) Cloning of *lacS*  
3 knockout plasmid (pPIS-*lacS*). Diagram shows major features of pPIS-*lacS*, containing *pyrEF*  
4 marker from *S. solfataricus* P2, upstream (Up-arm) and downstream (Dn-arm) flanking region of  
5 *lacS*. For flow chart of constructing *lacS* deletion mutants via PIS strategy, see reference (1) (B)  
6 Identification of pPIS-*lacS* transformants (pPIS-*lacS*-T) by PCR. *lacS* alleles from wild-type and  
7 two transformants were analyzed using primer pairs *lacS* flankP-F/R. The expected size range of  
8 PCR products are as follows: wild-type gene, ~3.1kb; transformants allele: ~9.0kb; mutants allele:  
9 ~1.7kb. 2-Log DNA Ladders (0.1-10.0kb, NEB) were loaded in lane M. (C) Identification of *lacS*  
10 deletion mutants using *lacS* flankP-F/R. Lane M: GeneRuler Express DNA Ladder. Lane 1 and 2-5  
11 showed amplification of *lacS* alleles from wild-type strain and *lacS* deletion mutants respectively.  
12 (D) X-gal staining of wild-type strain, pPIS-*lacS*-T and *lacS* deletion mutant.

13

14 **Table. S1 Primers used in this study**

| Primers               | Sequence (5'---3') <sup>a</sup>                   |
|-----------------------|---------------------------------------------------|
| <i>SsopyrEF</i> -F    | 5' <u>CATGCCATGG</u> CATCAAACCTTATGTCTCATTACAAT3' |
| <i>SsopyrEF</i> -R    | 5'ACTA <u>ACGCGT</u> TACTGGCGTAGTTTAACATAAGG3'    |
| <i>lacS</i> -Up-F     | 5'AAA <u>ACGCGT</u> CCTTATCTCTGGATTGATGC3'        |
| <i>lacS</i> -Up-R     | 5'AGAA <u>CTGCAG</u> AGACCAACCGAACCTAAAGT3'       |
| <i>lacS</i> -Dn-F     | 5'AGAA <u>CTGCAG</u> ATAAGACCATTAAGGCACTAGAC3'    |
| <i>lacS</i> -Dn-R     | 5'AAG <u>CGT</u> CGACTTACTAAACAGAGGAGT3'          |
| <i>lacS</i> -flankP-F | 5'TACGGGAAGTAACACGGAGC3'                          |

*lacS*-flankP-R 5'GTGGCACTTATTTGAGGGTATTA3'

*SsolacS*-F 5'AAGCGTCGACCTCCTCTTATTATTAGAATTGTACGC3'

*SsolacS*-R 5'AAAACGCGTCCTAGTGTTGCAAGGCAGAT3'

*argD*-Up-F 5'CGCGGATCCCCTTGACCTTGTAATAACTACTGT3'

*argD*-Up-R 5'CGGGGTACCTGTTCTGACATCTTTCTTTCTTAT3'

*argD*-Dn -F 5'CGGGGTACCAGTTCACAATAGTTTTTTATATTAATCTC3'

*argD*-Dn -R 5'AAGCGTCGACTGGAAACTTACCATTAGGCTG3'

*argD*-flankP-F 5'ATCCCAAGGTTACCGTGAA 3'

*argD*-flankP-R 5'TATCCTTTCACCAGGCTTTG3'

*pyrEF*-flankP-F 5'CGCTACTCTATAGCCTTCACTTC3'

*pyrEF*-flankP-R 5'AGATGATGAGGTGGACAGGTT3'

*SsoargD*-F 5'CATGCCATGGATTCTCCAATATATGGGGTTT3'

*SsoargD*-R 5'ACATGCATGCGAAACGGCCGTACTTTCTTACTGCTTTGATCAA3'

*SsoargD*-R1 5'ACTAACGCGTTACTTTCTTACTGCTTTGATCAA3'

*SsoargD*-F2 5'AAGCGTCGACATTCTCCAATATATGGGGTTT3'

*SsoargD*-R2 5'TCACCCCGGGTACTTTCTTACTGCTTTGATCAA3'

*upsEF*-Up-F 5'TCGCGTCGACGGTAATCCAGACAAGAACGC3'

*upsEF*-Up-R 5'CGGGGTACCAACAGAATACTCTTGAAGAATATTCA3'

*upsEF*-Dn-F 5'CGGGGTACCTAAAAAGGTAAATTATTTTCGATG3'

*upsEF*-Dn-R 5'ACGCGGATCCTTCCTTAACAGGTATGTTGCTAT3'

*upsEF*-Tg-F 5'ACATGCATGCAACATATACAAGTGGCGAGTC3'

*upsEF*-Tg-R 5'GAAACGGCCGTTAGATTAAGTTAAAGATAACGTTTC3'

---

*upsEF*-flankP-F            5'ATTCCCTCGAAATCTCTGC3'

*upsEF*-flankP-R            5'CGCTGTTCCACATTTTAGAG3'

---

15    <sup>a</sup> Added restriction sites are underlined.

16

17    **Reference**

- 18    1.    **Deng L, Zhu H, Chen Z, Liang YX, She Q.** 2009. Unmarked gene deletion and  
19            host-vector system for the hyperthermophilic crenarchaeon *Sulfolobus islandicus*.  
20            *Extremophiles* **13**:735-746.

21

22
